# Supplementary material
Source: MDPI journal article supplement (https://www.mdpi.com/2073-4395/12/1/200)
Supplement: s1 [file s1]

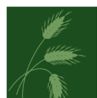

## Supplementary

**Table S1.** Cross-tab and Stepwise multiple linear regression analysis.

| Cross-tab                                                    |                                                                                                        |                       |              |                              |                              | Stepwise multiple linear regression |            |        |      |
|--------------------------------------------------------------|--------------------------------------------------------------------------------------------------------|-----------------------|--------------|------------------------------|------------------------------|-------------------------------------|------------|--------|------|
| Psychological factors                                        |                                                                                                        | Strongly disagree (1) | Disagree (2) | Undecided (3)                | Agree (4)                    | Strongly agree (5)                  | t          | Sig.   |      |
| Perceived pro-environmental personal norms (PPN)             | PPN1: The use of rice straw is consistent with your farming values.                                    | Burning (85.71%)      |              | Incorporation (76.92%)       | Compacting (92.86%)          | (Constant)                          | 139.267    | .000   |      |
|                                                              |                                                                                                        |                       |              |                              | Free-grazing ducks (100.00%) | Burning                             | -67.553    | .000   |      |
|                                                              |                                                                                                        |                       |              |                              | Mixed method (100.00%)       | Incorporation                       | -7.165     | .000   |      |
|                                                              |                                                                                                        |                       |              |                              |                              |                                     |            |        |      |
|                                                              | PPN2: You feel it is your responsibility to help reduce air pollution.                                 | Burning (85.71%)      |              | Incorporation (76.92%)       | Compacting (92.86%)          | (Constant)                          | 139.267    | .000   |      |
|                                                              |                                                                                                        |                       |              |                              | Free-grazing ducks (100.00%) | Burning                             | -67.553    | .000   |      |
|                                                              |                                                                                                        |                       |              |                              | Mixed method (100.00%)       | Incorporation                       | -7.165     | .000   |      |
|                                                              |                                                                                                        |                       |              |                              |                              |                                     |            |        |      |
|                                                              | PPN3: You feel guilty if you do not utilize the rice straw.                                            | Burning (78.10%)      |              |                              | compacting (82.65%)          | (Constant)                          | 108.24     | .000   |      |
|                                                              |                                                                                                        |                       |              |                              | Incorporation (100.00%)      | Burning                             | -48.848    | .000   |      |
|                                                              |                                                                                                        |                       |              |                              | Free-grazing ducks (100.00%) |                                     |            |        |      |
|                                                              |                                                                                                        |                       |              |                              | Mixed method (85.71%)        |                                     |            |        |      |
| Perceived cues to rice straw utilization (PCU)               | PCU1: You have read/heard/received the information of using rice straw to reduce environmental problem | Burning (85.71%)      |              | Compacting (73.47%)          | (Constant)                   | 28.271                              | .000       |        |      |
|                                                              |                                                                                                        |                       |              | Incorporation (100.00%)      | Burning                      | -14.996                             | .000       |        |      |
|                                                              |                                                                                                        |                       |              | Free-grazing ducks (100.00%) | Compacting                   | -2.059                              | .041       |        |      |
|                                                              |                                                                                                        |                       |              | Mixed method (57.14%)        |                              |                                     |            |        |      |
|                                                              | PCU2: Local authorities educate about rice straw utilization.                                          | Burning (85.71%)      |              | Incorporation (76.92%)       | Compacting (62.24%)          | (Constant)                          | 43.713     | .000   |      |
|                                                              |                                                                                                        |                       |              |                              | Free-grazing ducks (100.00%) | Burning                             | -19.45     | .000   |      |
|                                                              |                                                                                                        |                       |              |                              | Mixed method (85.71%)        | Mixed method                        | 3.143      | .002   |      |
|                                                              |                                                                                                        |                       |              |                              |                              |                                     |            |        |      |
|                                                              | PCU3: You can access facilities of rice straw utilization such as purchasing sites near the community. | Burning (71.43%)      |              |                              |                              | Compacting (53.06%)                 | (Constant) | 87.602 | .000 |
|                                                              |                                                                                                        |                       |              |                              |                              | Incorporation (61.54%)              | Burning    | -39.92 | .000 |
|                                                              |                                                                                                        |                       |              |                              |                              | Free-grazing ducks (100.00%)        |            |        |      |
|                                                              |                                                                                                        |                       |              |                              |                              | Mixed method (80.95%)               |            |        |      |
| Perceived behavioral control of rice straw utilization (PBC) | PBC1: You have a good understanding of how to gain benefits from rice straw.                           | Burning (85.71%)      |              | Incorporation (61.54%)       | Compacting (51.02%)          | (Constant)                          | 81.273     | .000   |      |
|                                                              |                                                                                                        |                       |              | Free-grazing ducks (100.00%) | Mixed method (66.67%)        | Burning                             | -36.035    | .000   |      |

| Cross-tab                                      |                                                                                      |                       |                              |                              | Stepwise multiple linear regression |                    |         |      |
|------------------------------------------------|--------------------------------------------------------------------------------------|-----------------------|------------------------------|------------------------------|-------------------------------------|--------------------|---------|------|
| Psychological factors                          |                                                                                      | Strongly disagree (1) | Disagree (2)                 | Undecided (3)                | Agree (4)                           | Strongly agree (5) | t       | Sig. |
|                                                | PBC2: Rice straw utilization is easy and uncomplicated.                              | Burning (85.71%)      |                              |                              | Compacting (79.59%)                 | (Constant)         | 67.988  | .000 |
|                                                |                                                                                      |                       |                              |                              | Incorporation (84.62%)              | Burning            | -30.752 | .000 |
|                                                |                                                                                      |                       |                              |                              | Free-grazing ducks (100.00%)        |                    |         |      |
|                                                |                                                                                      |                       |                              |                              | Mixed method (66.67%)               |                    |         |      |
|                                                | PBC3: You feel confident that rice straw can be utilized.                            | Burning (86.67%)      |                              |                              | Compacting (75.51%)                 | (Constant)         | 127.083 | .000 |
|                                                |                                                                                      |                       |                              |                              | Incorporation (76.92%)              | Burning            | -61.495 | .000 |
|                                                |                                                                                      |                       |                              |                              | Free-grazing ducks (100.00%)        |                    |         |      |
|                                                |                                                                                      |                       |                              |                              | Mixed method (85.71%)               |                    |         |      |
| Perceived severity of rice straw burning (PSB) | PSB1: Rice straw burning is a threat to local people's health.                       | Burning (85.71%)      | Incorporation (76.92%)       | Compacting (71.43%)          | (Constant)                          | 71.151             | .000    |      |
|                                                |                                                                                      |                       | Free-grazing ducks (100.00%) | Mixed method (57.14%)        | Burning                             | -28.227            | .000    |      |
|                                                |                                                                                      |                       |                              |                              | Free-grazing ducks                  | -2.919             | .004    |      |
|                                                |                                                                                      |                       |                              |                              |                                     |                    |         |      |
|                                                | PSB2: Rice straw burning is a serious threat to the environment and agriculture.     | Burning (85.71%)      |                              | Compacting (87.76%)          | (Constant)                          | 108.968            | .000    |      |
|                                                |                                                                                      |                       |                              | Incorporation (100.00%)      | Burning                             | -45.599            | .000    |      |
|                                                |                                                                                      |                       |                              | Free-grazing ducks (100.00%) |                                     |                    |         |      |
|                                                |                                                                                      |                       |                              | Mixed method (85.71%)        |                                     |                    |         |      |
|                                                | PSB3: Rice straw burning is a serious threat for future generations.                 | Burning (85.71%)      | Compacting (100.00%)         | (Constant)                   | 99.98                               | .000               |         |      |
|                                                |                                                                                      |                       | Incorporation (100.00%)      | Burning                      | -28.342                             | .000               |         |      |
|                                                |                                                                                      |                       | Free-grazing ducks (100.00%) |                              |                                     |                    |         |      |
|                                                |                                                                                      |                       | Mixed method (100.00%)       |                              |                                     |                    |         |      |
|                                                | PSB4: People and the environment cannot cope with the effects of rice straw burning. |                       | Burning (80.95%)             | Compacting (100.00%)         | (Constant)                          | 133.643            | .000    |      |
|                                                |                                                                                      |                       |                              | Incorporation (100.00%)      | Burning                             | -35.078            | .000    |      |
|                                                |                                                                                      |                       |                              | Free-grazing ducks (100.00%) |                                     |                    |         |      |
|                                                |                                                                                      |                       |                              | Mixed method (100.00%)       |                                     |                    |         |      |
| Perceived ascription of responsibility (PAR)   | PAR1: Everyone should be responsible for air pollution.                              |                       |                              | Burning (80.95%)             | Compacting (100.00%)                | (Constant)         | 178.191 | .000 |
|                                                |                                                                                      |                       |                              |                              | Incorporation (100.00%)             | Burning            | -35.078 | .000 |
|                                                |                                                                                      |                       |                              |                              | Free-grazing ducks (100.00%)        |                    |         |      |
|                                                |                                                                                      |                       |                              |                              | Mixed method (100.00%)              |                    |         |      |
|                                                | PAR2: People in the community should avoid activities that                           |                       | Burning (80.95%)             | Compacting (61.22%)          | (Constant)                          | 85.472             | .000    |      |
|                                                |                                                                                      |                       |                              | Incorporation (100.00%)      | Burning                             | -27.237            | .000    |      |

| Cross-tab                                          |                                                                                                         |                         |                              |                              |                              | Stepwise multiple linear regression |              |
|----------------------------------------------------|---------------------------------------------------------------------------------------------------------|-------------------------|------------------------------|------------------------------|------------------------------|-------------------------------------|--------------|
| Psychological factors                              | Strongly disagree (1)                                                                                   | Disagree (2)            | Undecided (3)                | Agree (4)                    | Strongly agree (5)           | t                                   | Sig.         |
| cause air pollution.                               |                                                                                                         |                         | Free-grazing ducks (100.00%) |                              | Incorporation                | -3.29                               | .001         |
|                                                    |                                                                                                         |                         | Mixed method (57.14%)        |                              |                              |                                     |              |
| Perceived benefits of rice straw utilization (PBU) | PBU1: Rice straw utilization has a positive effect on agriculture and the environment around you.       |                         | Burning (80.95%)             | Compacting (100.00%)         | (Constant)                   | 178.191                             | .000         |
|                                                    |                                                                                                         |                         |                              | Incorporation (100.0%)       | burning                      | -35.078                             | .000         |
|                                                    |                                                                                                         |                         |                              | Free-grazing ducks (100.00%) |                              |                                     |              |
|                                                    |                                                                                                         |                         |                              | Mixed method (100.00%)       |                              |                                     |              |
|                                                    | PBU2: Rice straw utilization help increase income.                                                      | Burning (65.71%)        | Incorporation (100.00%)      | Mixed method (100.00%)       | Compacting (92.86%)          | (Constant)                          | 28.273 .000  |
|                                                    |                                                                                                         |                         | Free-grazing ducks (100.00%) |                              |                              | Compacting                          | 14.585 .000  |
|                                                    |                                                                                                         |                         |                              |                              |                              | Burning                             | -6.451 .000  |
|                                                    | PBU3: Rice straw utilization helps build good relationships in the community.                           | Burning (76.19%)        |                              | Compacting (100.00%)         |                              | Mixed method                        | 5.789 .000   |
|                                                    |                                                                                                         |                         |                              |                              | (Constant)                   | 164.284                             | .000         |
|                                                    |                                                                                                         |                         |                              | Incorporation (100.00%)      | Burning                      | -75.03                              | .000         |
|                                                    |                                                                                                         |                         |                              | Free-grazing ducks (100.00%) |                              |                                     |              |
|                                                    | PBU4: Rice straw utilization does not incur an extra cost.                                              | Burning (85.71%)        |                              | Mixed method (100.00%)       |                              |                                     |              |
|                                                    |                                                                                                         |                         |                              | Compacting (88.78%)          | (Constant)                   | 143.732                             | .000         |
|                                                    |                                                                                                         |                         |                              | Incorporation (100.00%)      | Burning                      | -67.29                              | .000         |
|                                                    |                                                                                                         |                         |                              | Free-grazing ducks (100.00%) |                              |                                     |              |
|                                                    | PBU5: Rice straw is more useful than burning, so it should be used for maximum benefit.                 | Burning (80.95%)        |                              | Mixed method (95.24%)        |                              |                                     |              |
|                                                    |                                                                                                         |                         |                              |                              | Compacting (98.98%)          | (Constant)                          | 168.097 .000 |
|                                                    |                                                                                                         |                         |                              |                              | Incorporation (100.00%)      | Burning                             | -70.586 .000 |
|                                                    |                                                                                                         |                         |                              |                              | Free-grazing ducks (100.00%) |                                     |              |
| Perceived benefits of current option (PBO)         | PBO1: Your rice straw and stubble management option can help generate income for yourself/ your family. | Burning (85.71%)        | Free-grazing ducks (100.00%) | Mixed method (100.00%)       | Compacting (92.86%)          | (Constant)                          | 17.541 .000  |
|                                                    |                                                                                                         | Incorporation (100.00%) |                              |                              |                              | Compacting                          | 34.396 .000  |
|                                                    |                                                                                                         |                         |                              |                              |                              | Mixed method                        | 15.059 .000  |
|                                                    | PBO2: Your rice straw and stubble management option has low costs.                                      |                         | Free-grazing ducks (100.00%) | Burning (69.52%)             | Compacting (77.55%)          | (Constant)                          | 54.04 .000   |
|                                                    |                                                                                                         |                         |                              | Incorporation (76.92%)       |                              | Compacting                          | 10.281 .000  |
|                                                    |                                                                                                         |                         |                              | Mixed method (100.00%)       |                              | Burning                             | 4.719 .000   |
|                                                    |                                                                                                         |                         |                              |                              |                              | Free-grazing ducks                  | -3.587 .000  |
|                                                    |                                                                                                         |                         |                              |                              |                              |                                     |              |
|                                                    |                                                                                                         |                         |                              |                              |                              |                                     |              |
|                                                    |                                                                                                         |                         |                              |                              |                              |                                     |              |

| Cross-tab                                                                                                                      |                       |              |                   |                              | Stepwise multiple linear regression |                    |         |       |
|--------------------------------------------------------------------------------------------------------------------------------|-----------------------|--------------|-------------------|------------------------------|-------------------------------------|--------------------|---------|-------|
| Psychological factors                                                                                                          | Strongly disagree (1) | Disagree (2) | Undecided (3)     | Agree (4)                    | Strongly agree (5)                  | t                  | Sig.    |       |
| PBO3: Your rice straw and stubble management option can help reduce air pollution.                                             | Burning (80.95%)      |              |                   |                              | Compacting (92.86%)                 | (Constant)         | 185.639 | .000  |
|                                                                                                                                |                       |              |                   |                              | Incorporation (100.00%)             | Burning            | -93.247 | .000  |
|                                                                                                                                |                       |              |                   |                              | Free-grazing ducks (100.00%)        |                    |         |       |
|                                                                                                                                |                       |              |                   |                              | Mixed method (100.00%)              |                    |         |       |
| PBO4: Your rice straw and stubble management option does not cause trouble for others and allows people to coexist peacefully. |                       |              | Burning (86.70%)  | Free-grazing ducks (100.00%) | Compacting (100.00%)                | (Constant)         | 211.615 | 0     |
|                                                                                                                                |                       |              |                   |                              | Incorporation (76.90%)              | Burning            | -54.455 | 0     |
|                                                                                                                                |                       |              |                   |                              | Mixed method (100%)                 | Free-grazing ducks | -5.795  | 0     |
|                                                                                                                                |                       |              |                   |                              |                                     | Incorporation      | -2.864  | 0.005 |
| PBO5: Your rice straw and stubble management option is appropriate for the available resources in your community.              |                       |              | Burning (100.00%) | Free-grazing ducks (100.00%) | Compacting (54.08%)                 | (Constant)         | 124.907 | 0     |
|                                                                                                                                |                       |              |                   |                              | Incorporation (53.85%)              | Burning            | -29.402 | 0     |
|                                                                                                                                |                       |              |                   |                              | Mixed method (85.71%)               | Mixed method       | 2.606   | 0.01  |
|                                                                                                                                |                       |              |                   |                              |                                     | Free-grazing ducks | -2.389  | 0.018 |
